# Supplementary material
Source: PubMed Central journal article supplement (PMC11028681)
Supplement: 262_2017_1975_MOESM1_ESM.pdf [file 262_2017_1975_MOESM1_ESM.pdf]

## Supplementary Figure 1

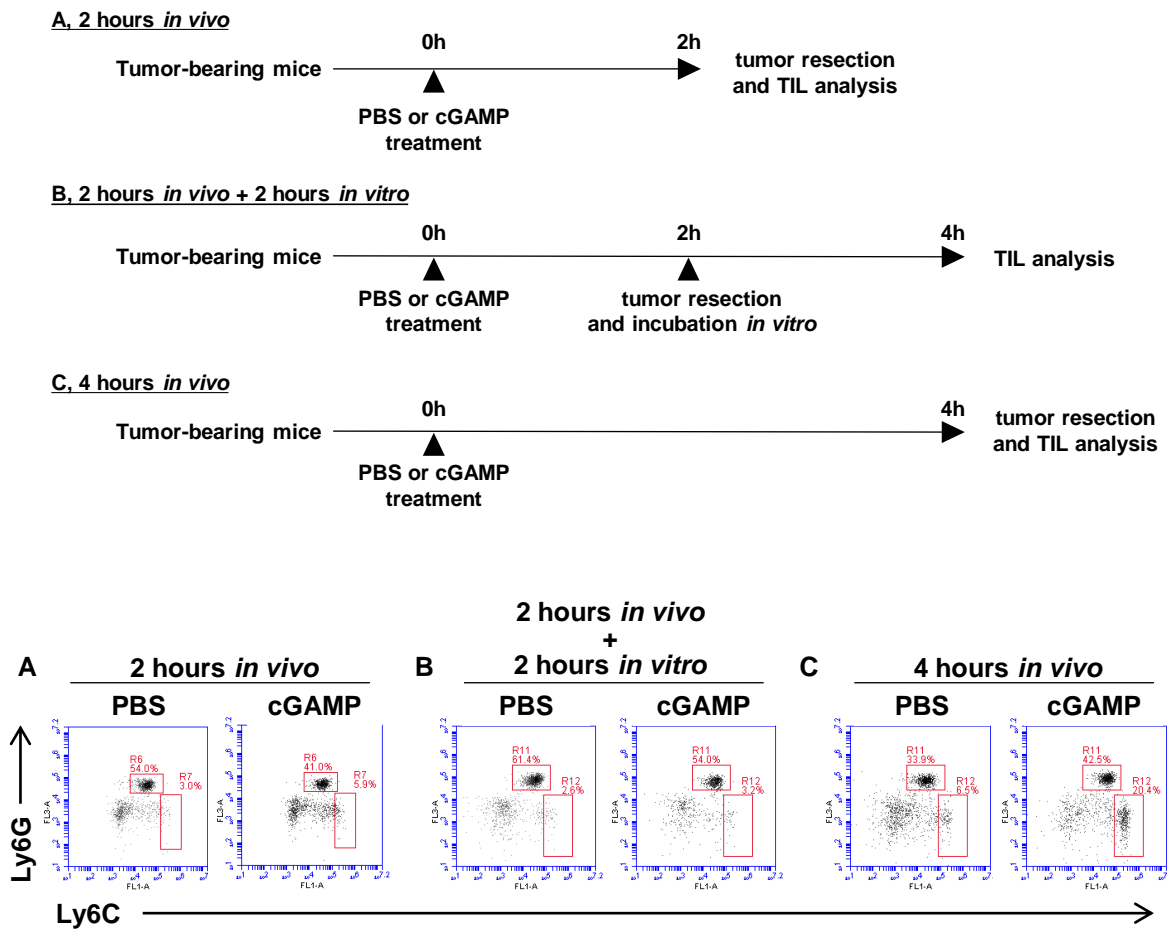

**Supplementary figure 1.** To evaluate whether the increased population was recruited from periphery or not, tumor tissue was resected in 2 hours after treatment with PBS or cGAMP followed by *in vitro* incubation with the culture media for 2 hours (B). TILs were collected and analyzed by flow cytometry. As controls, TILs were analyzed right after tumor resection in 2 (A) and 4 (C) hours after each treatment. Data represent the population of Ly6G<sup>+</sup> neutrophils and Ly6C<sup>+</sup> macrophages gated on CD45<sup>+</sup> CD11b<sup>+</sup> cells in TILs.

## Supplementary Figure 2

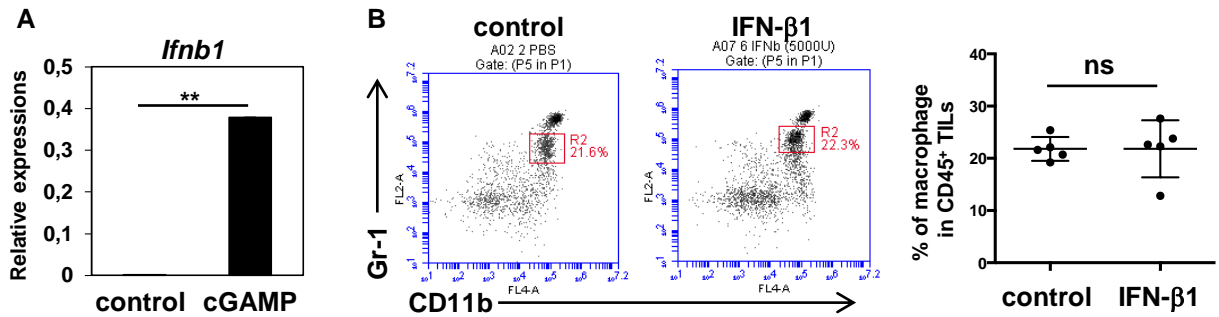

**Supplementary figure 2.** (A) mRNA expression levels of *Ifnb1* was determined by real-time PCR in the tumor tissues resected in 2 hours after i.t. treatment with PBS or cGAMP.  $**P < 0.01$ , based on an unpaired *t* test. (B) Represent flow cytometry data of CD11b<sup>mid</sup> Gr-1<sup>mid</sup> cells gated on CD45<sup>+</sup> TILs collected in 20 hours after i.t. treatment with 5000U of IFN- $\beta$ 1. The percentages of the CD11b<sup>mid</sup> Gr-1<sup>mid</sup> cells were depicted in the rightmost panel. ns; not significant based on an unpaired *t* test.
